# Supplementary material for: Enhanced phase prediction of high-entropy alloys through machine learning and data augmentation
Source: Royal Society of Chemistry journal article supplement (doi:10.1039/d4cp04496g), 2024-12-17
Supplement: d4cp04496g1.pdf [file d4cp04496g1.pdf]

## Supplementary materials

### Enhanced phase prediction of high-entropy alloys through machine learning and data augmentation

Song Wu<sup>a</sup>, Zihao Song<sup>a</sup>, Jianwei Wang<sup>a</sup>, Xiaobin Niu<sup>a\*</sup>, Haiyuan Chen<sup>a\*</sup>

<sup>a</sup>*School of Materials and Energy, University of Electronic Science and Technology of China, Chengdu 611731, China.*

\*Email: [xbniu@uestc.edu.cn](mailto:xbniu@uestc.edu.cn); [hychen@uestc.edu.cn](mailto:hychen@uestc.edu.cn)

Table S1 Input parameters and the corresponding formula for ML models.

| Parameters                                            | Formula                                                                   |
|-------------------------------------------------------|---------------------------------------------------------------------------|
| Mean atomic radius                                    | $a = \sum_{i=1}^n c_i r_i$                                                |
| Atomic size difference                                | $R_d = \sqrt{\sum_{i=1}^n c_i \left(1 - \frac{r_i}{a}\right)^2}$          |
| Average of the melting points of constituent elements | $T_m = \sum_{i=1}^n c_i T_{mi}$                                           |
| Standard deviation of melting temperature             | $D_{-}T_m = \sqrt{\sum_{i=1}^n c_i \left(1 - \frac{T_i}{T_m}\right)^2}$   |
| Average mixing enthalpy                               | $H_{mix} = 4 \sum_{i \neq j} c_i c_j H_{ij}$                              |
| Standard deviation of mixing enthalpy                 | $D_{-}H_{mix} = \sqrt{\sum_{i \neq j} c_i c_j (H_{ij} - H_{mix})^2}$      |
| Ideal mixing entropy                                  | $S_{id} = -k_B \sum_{i=1}^n c_i \ln c_i$                                  |
| Electronegativity                                     | $Elec\_nega = \sum_{i=1}^n c_i (Elec\_nega)_i$                            |
| Standard deviation of electronegativity               | $D_{-}elec\_nega = \sqrt{\sum_{i=1}^n c_i (elec\_nega_i - elec\_nega)^2}$ |
| Average VEC                                           | $VEC = \sum_{i=1}^n c_i VEC_i$                                            |

|                                    |                                                                         |
|------------------------------------|-------------------------------------------------------------------------|
| Standard deviation of VEC          | $D\_VEC = \sqrt{\sum_{i=1}^n c_i (VEC_i - VEC)^2}$                      |
| Mean bulk modulus                  | $Bulk\ modulus = \sum_{i=1}^n c_i Bulk\ modulus_i$                      |
| Standard deviation of bulk modulus | $D\_Bulk = \sqrt{\sum_{i=1}^n c_i (Bulk\ modulus_i - Bulk\ modulus)^2}$ |

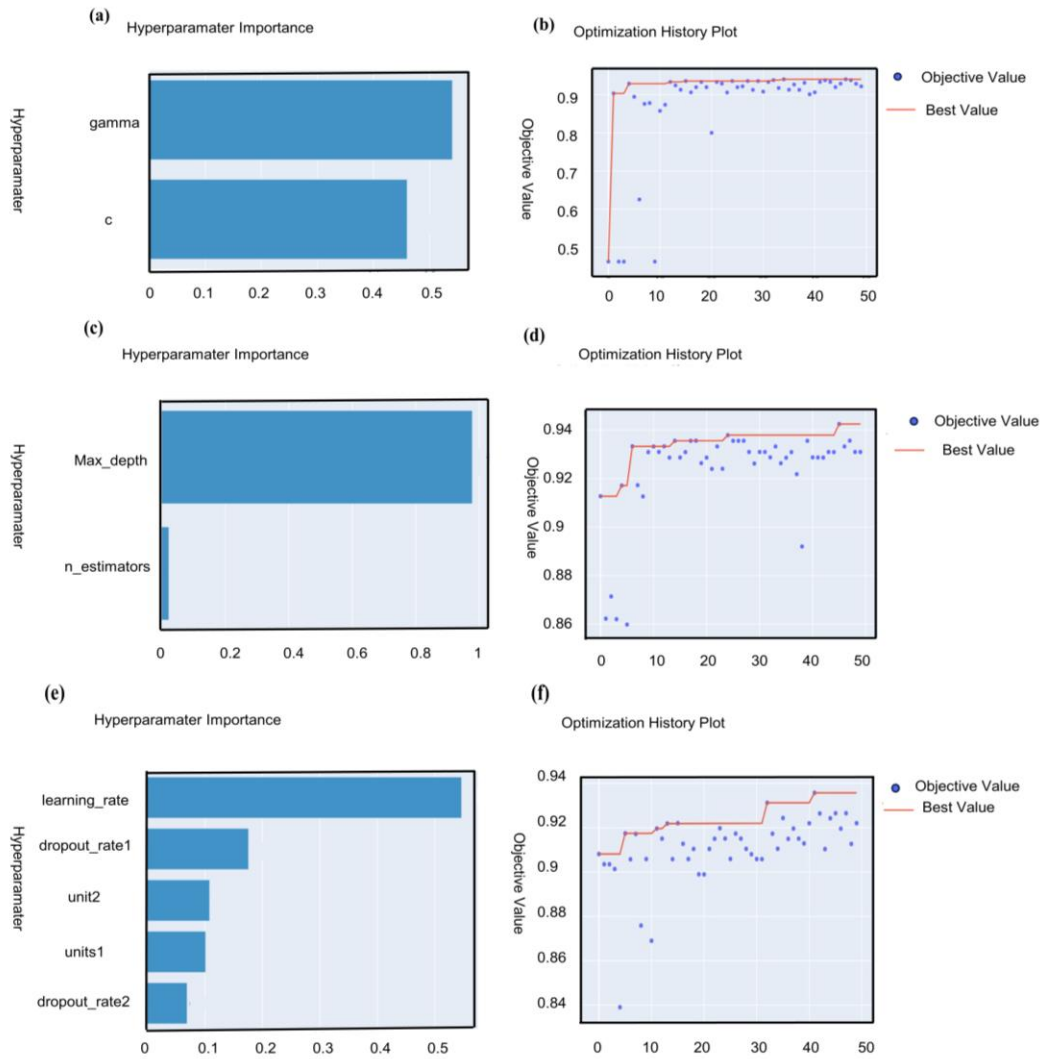

Fig. S1. The process of hyperparameter tuning. (a) (c) (e) represent the importance of SVM, RF, and ANN hyperparameters respectively. (b) (d) (f) represent the renderings of 50 iterations of SVM, RF, and ANN hyperparameters respectively.

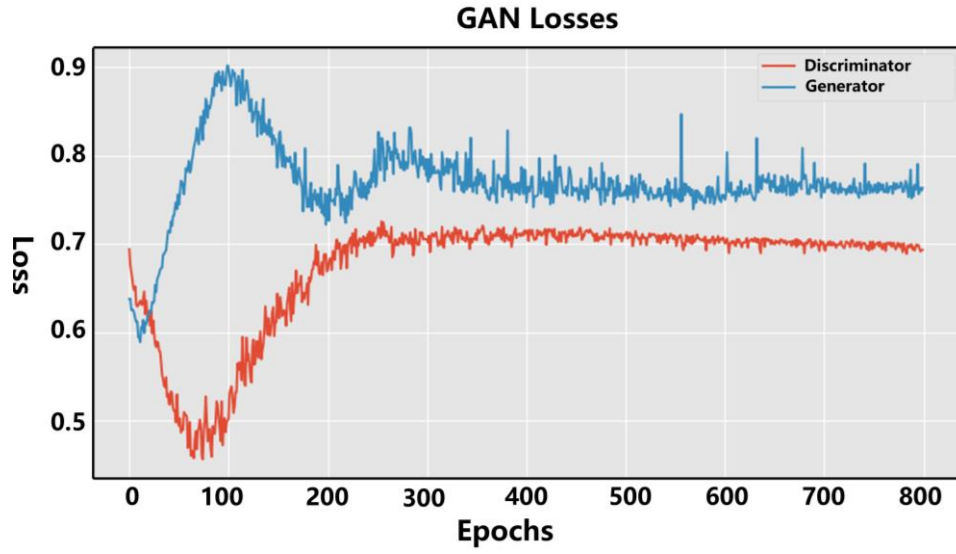

Fig. S2. the generator and discriminator loss curves

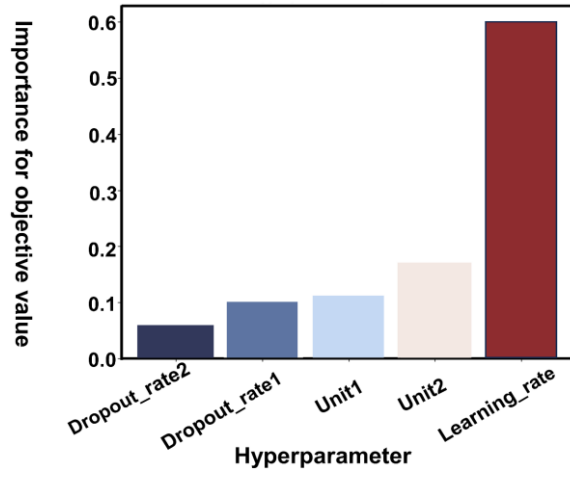

Fig. S3. Significance of each hyperparameter in the ANN.
